# Supplementary material for: Optical Coherence Tomography Evaluation of Peripapillary and Macular Structure Changes in Pre-perimetric Glaucoma, Early Perimetric Glaucoma, and Ocular Hypertension: A Systematic Review and Meta-Analysis
Source: PubMed Central journal article supplement (PMC8280320; doi:10.3389/fmed.2021.696004), 2021-07-01
Supplement: Data_Sheet_1.pdf [file Data_Sheet_1.pdf]

## Supplementary figures

**Figure S1.** Subgroup analysis of average pRNFL thickness in patients with PPG and OHT according to the type of OCT.

**Figure S2.** Funnel plot of average and sectoral pRNFL thickness in patients with PPG and EG. (A) Average. (B) Superior. (C) Nasal. (D) Inferior. (E) Temporal.

**Figure S3.** Funnel plot of average and sectoral mGCC thickness in patients with PPG and EG. (A) Average. (B) Superior. (C) Inferior.

**Figure S4.** Funnel plot of average and sectoral pRNFL thickness in patients with PPG and OHT. (A) Average. (B) Superior. (C) Inferior.

**Figure S5.** Funnel plot of average and sectoral mGCC thickness in patients with PPG and OHT. (A) Average. (B) Superior. (C) Inferior.

**Figure S6.** Funnel plot of average and sectoral mGCIPL thickness in patients with PPG and EG. (A) Average. (B) Superior. (C) Inferior.

**Figure S7.** Sensitivity analysis of pRNFL thickness in patients with PPG and EG. (A) Average. (B) Superior. (C) Nasal. (D) Inferior. (E) Temporal.

**Figure S8.** Sensitivity analysis of mGCIPL thickness in patients with PPG and EG. (A) Average. (B) Superior. (C) Inferior.

**Figure S9.** Sensitivity analysis of mGCC thickness in patients with PPG and EG. (A) Average. (B) Superior. (C) Inferior.

**Figure S10.** Sensitivity analysis of pRNFL thickness in patients with PPG and OHT. (A) Average. (B) Superior. (C) Inferior.

**Figure S11.** Sensitivity analysis of mGCC thickness in patients with PPG and OHT. (A) Average. (B) Superior. (C) Inferior.

**Figure S12.** Average mGCIPL thickness in patients with PPG and EG after excluding the study of Kim et al.

**Figure S13.** Funnel plot of average GCIPL thickness in patients with PPG and EG after excluding the study of Kim et al.

**Figure S14.** Average mGCC thickness in patients with PPG and EG after excluding the study of Aydogan et al.

**Figure S15.** Average mGCC thickness in patients with PPG and OHT after excluding the study of Aydogan et al.

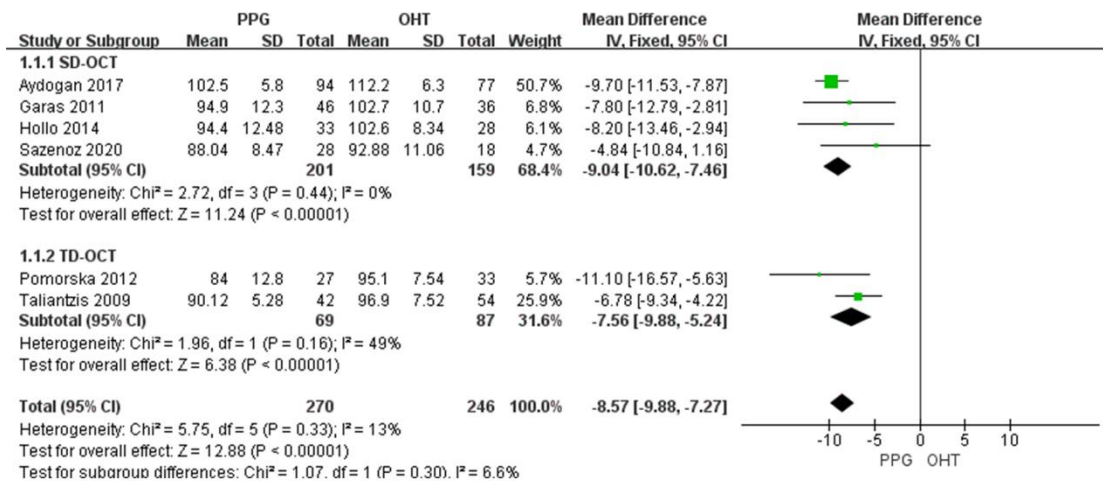

**Figure S1.** Subgroup analysis of average pRNFL thickness in patients with PPG and OHT according to the type of OCT.

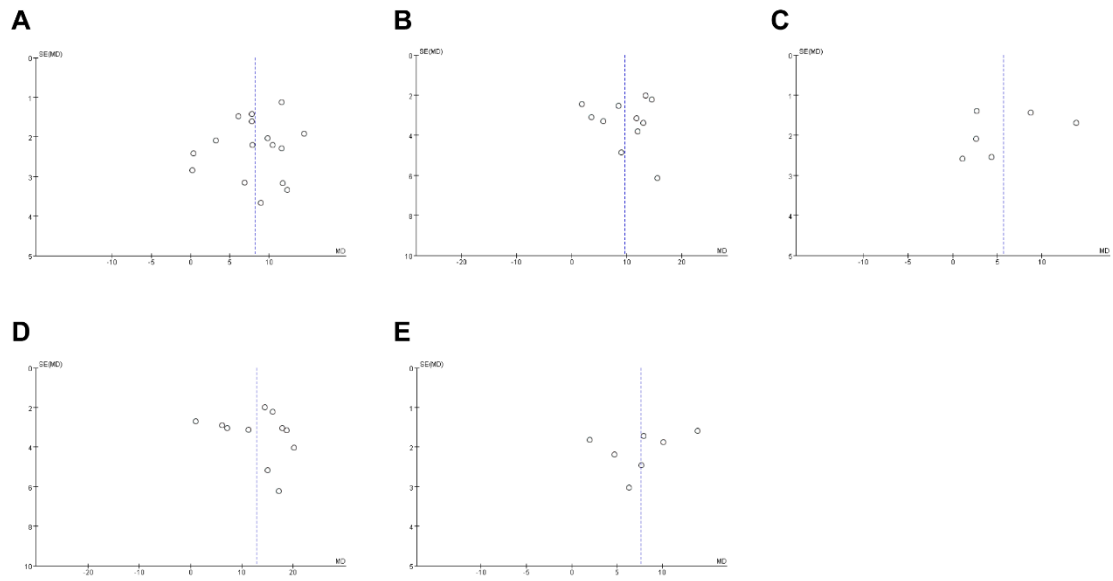

**Figure S2.** Funnel plot of average and sectoral pRNFL thickness in patients with PPG and EG. **(A)** Average. **(B)** Superior. **(C)** Nasal. **(D)** Inferior. **(E)** Temporal.

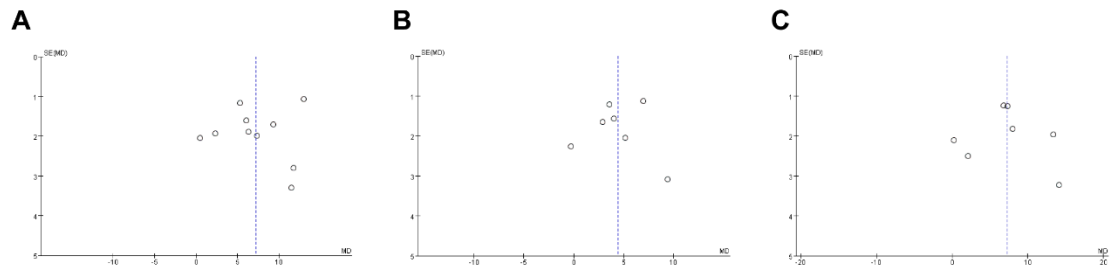

**Figure S3.** Funnel plot of average and sectoral mGCC thickness in patients with PPG and EG. **(A)** Average. **(B)** Superior. **(C)** Inferior.

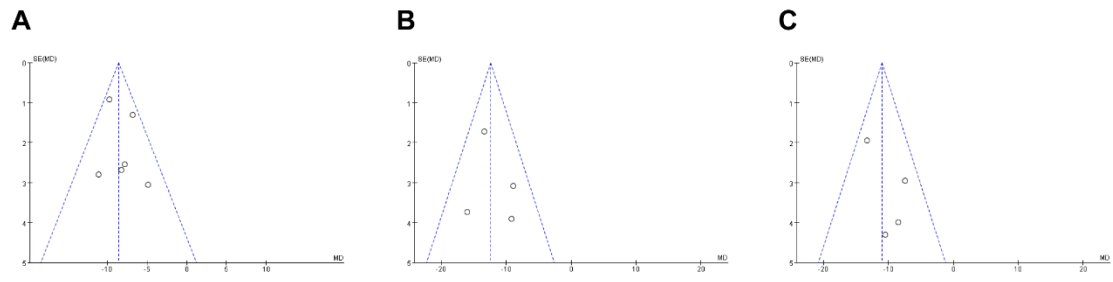

**Figure S4.** Funnel plot of average and sectoral pRNFL thickness in patients with PPG and OHT. **(A)** Average. **(B)** Superior. **(C)** Inferior.

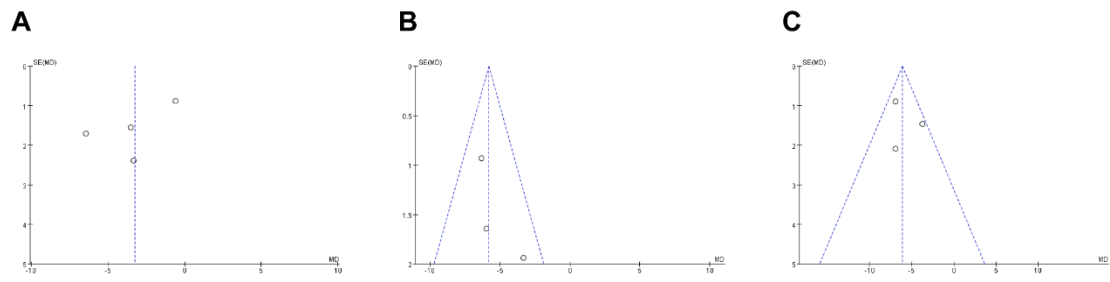

**Figure S5.** Funnel plot of average and sectoral mGCC thickness in patients with PPG and OHT. **(A)** Average. **(B)** Superior. **(C)** Inferior.

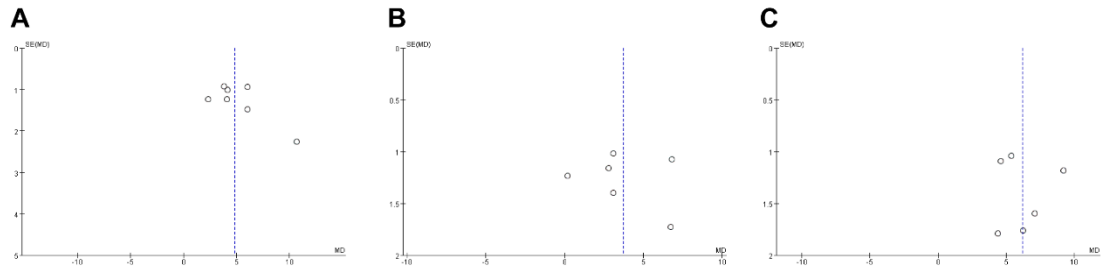

**Figure S6.** Funnel plot of average and sectoral mGCIPL thickness in patients with PPG and EG. **(A)** Average. **(B)** Superior. **(C)** Inferior.

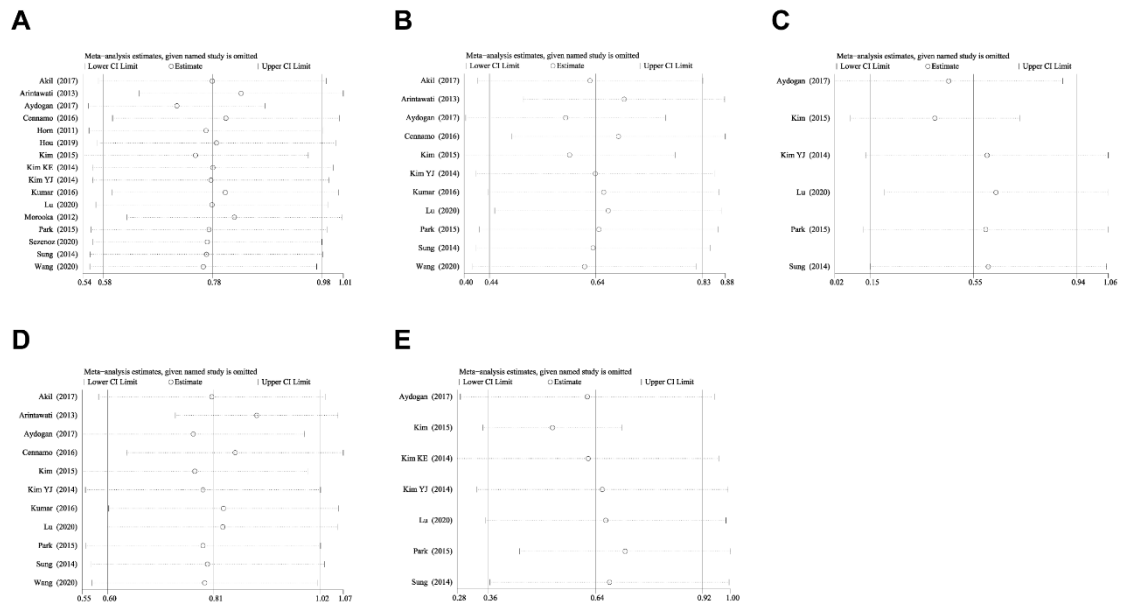

**Figure S7.** Sensitivity analysis of pRNFL thickness in patients with PPG and EG. **(A)** Average. **(B)** Superior. **(C)** Nasal. **(D)** Inferior. **(E)** Temporal.



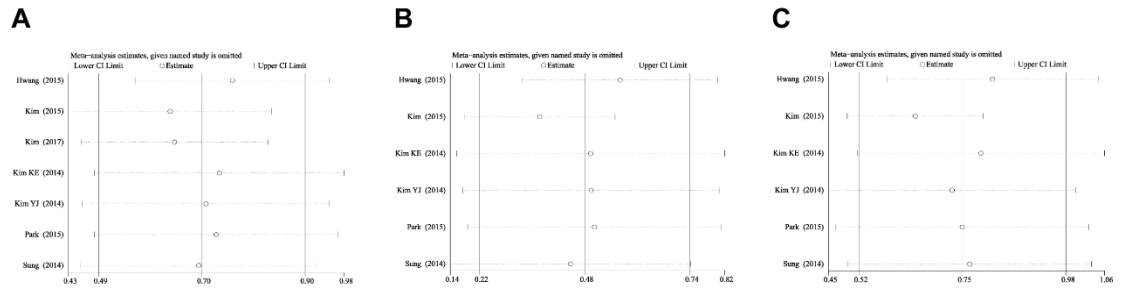

**Figure S8.** Sensitivity analysis of mGC IPL thickness in patients with PPG and EG. **(A)** Average. **(B)** Superior. **(C)** Inferior.

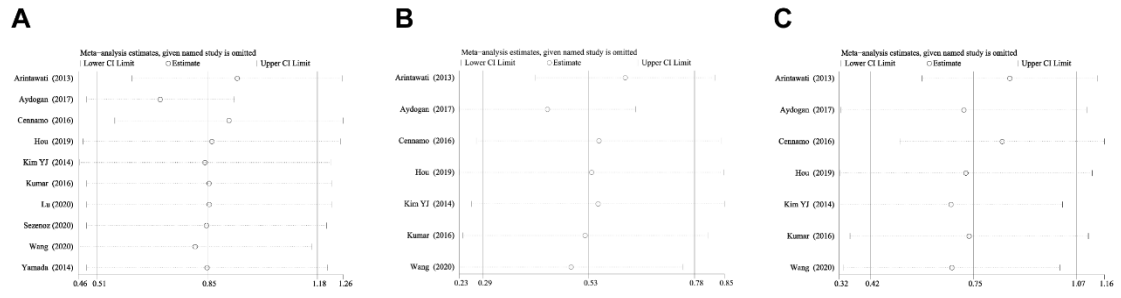

**Figure S9.** Sensitivity analysis of mGCC thickness in patients with PPG and EG. **(A)** Average. **(B)** Superior. **(C)** Inferior.

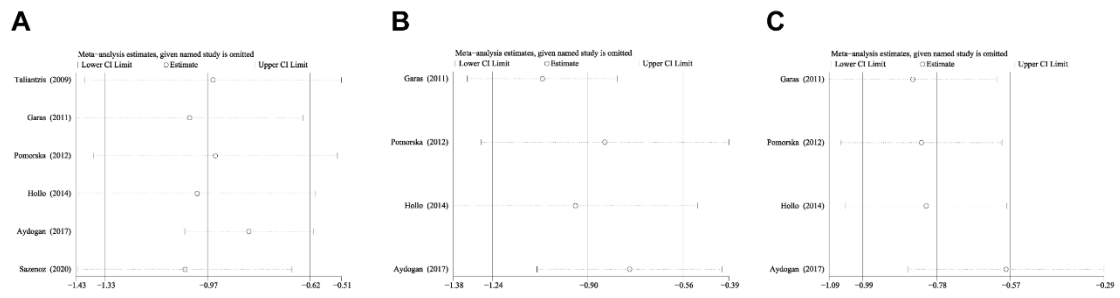

**Figure S10.** Sensitivity analysis of pRNFL thickness in patients with PPG and OHT. **(A)** Average. **(B)** Superior. **(C)** Inferior.

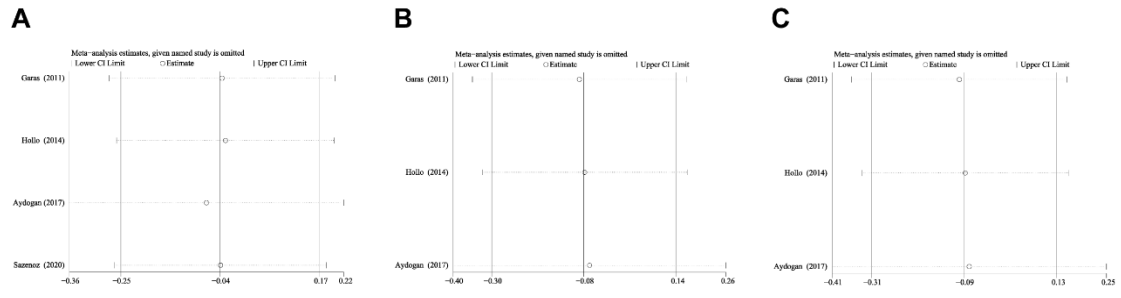

**Figure S11.** Sensitivity analysis of mGCC thickness in patients with PPG and OHT. **(A)** Average. **(B)** Superior. **(C)** Inferior.

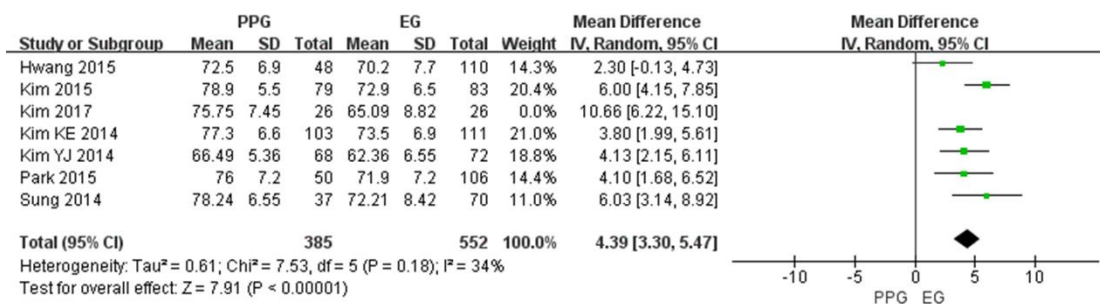

**Figure S12.** Average mGCIPL thickness in patients with PPG and EG after excluding the study of Kim et al.

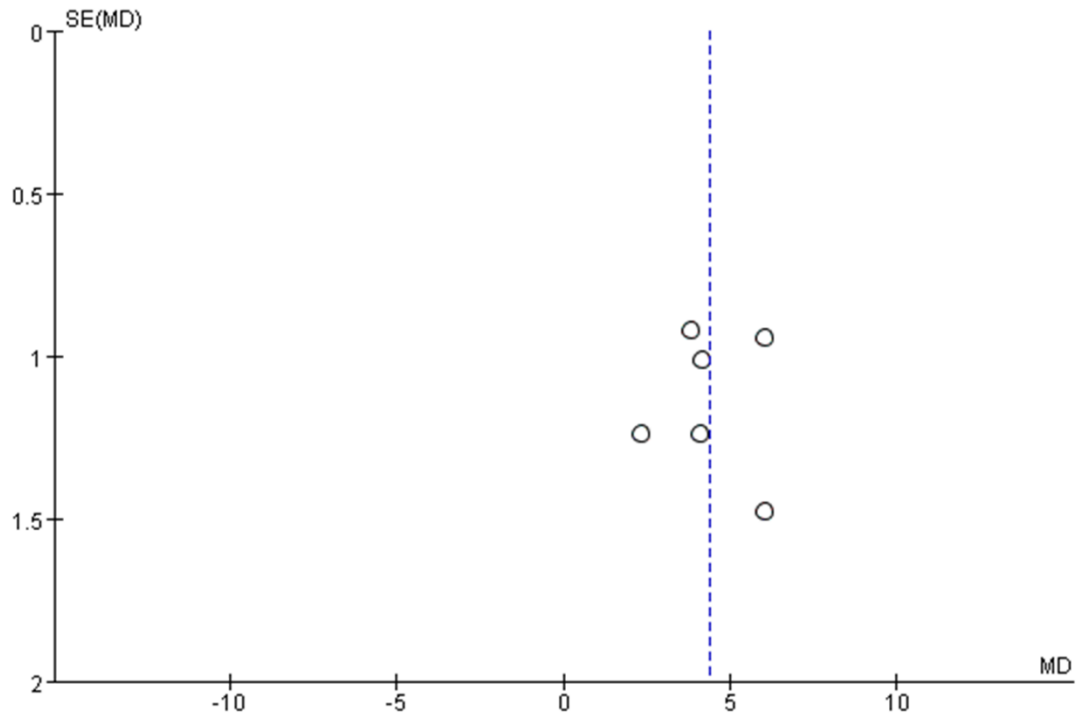

**Figure S13.** Funnel plot of average GCIPL thickness in patients with PPG and EG after excluding the study of Kim et al.

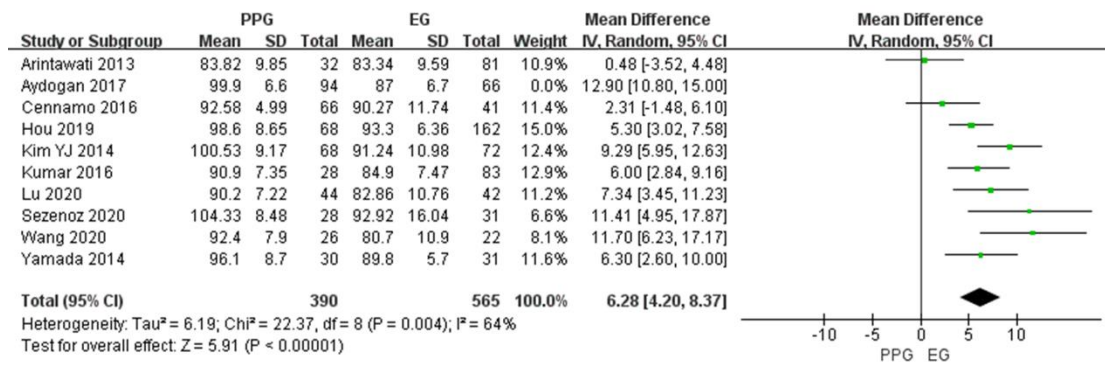

**Figure S14.** Average mGCC thickness in patients with PPG and EG after excluding the study of Aydogan et al.

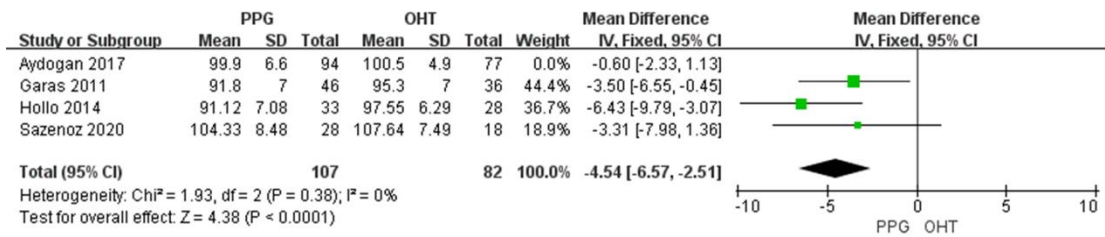

**Figure S15.** Average mGCC thickness in patients with PPG and OHT after excluding the study of Aydogan et al.
